# Supplementary material
Source: MDPI journal article supplement (https://www.mdpi.com/2071-1050/14/19/12737)
Supplement: s1 [file s1]

**Table S1.** Analysis of variance for all the study parameters to determine the effect of the study year.

| Parameter                         | Degree of freedom |           |                  | p-values |           |                  |
|-----------------------------------|-------------------|-----------|------------------|----------|-----------|------------------|
|                                   | Year              | Treatment | Year × Treatment | Year     | Treatment | Year × Treatment |
| Weed density (m <sup>-2</sup> )   | 2                 | 9         | 18               | < 0.001  | < 0.001   | < 0.001          |
| Weed biomass (g m <sup>-2</sup> ) | 2                 | 9         | 18               | < 0.001  | < 0.001   | < 0.001          |
| Weed control (%)                  | 2                 | 8         | 16               | < 0.001  | < 0.001   | < 0.001          |
| Number of fruits (per plant)      | 2                 | 9         | 18               | 0.152    | < 0.001   | 0.061            |
| Tomato yield (kg per plant)       | 2                 | 9         | 18               | 0.074    | < 0.001   | 0.284            |
| Yield gain (%)                    | 2                 | 8         | 16               | < 0.001  | < 0.001   | 0.972            |

The years, treatments and their interaction were the sources of variation. The p-values < 0.05 are significant.

**Table S2.** Analysis of variance for weed parameters for three years of the study.

| Parameter                         | Degree of freedom | p-values |         |         |
|-----------------------------------|-------------------|----------|---------|---------|
|                                   |                   | 2019     | 2020    | 2021    |
| Weed density (m <sup>-2</sup> )   | 9                 | < 0.001  | < 0.001 | < 0.001 |
| Weed biomass (g m <sup>-2</sup> ) | 9                 | < 0.001  | < 0.001 | < 0.001 |
| Weed control (%)                  | 8                 | < 0.001  | < 0.001 | < 0.001 |

The only source of variation was the weed control treatment. The p-values < 0.05 are significant.

**Table S3.** Analysis of variance for number of tomatoes, tomato yield and yield gain (based on the pooled data of three years).

| Parameter                    | Degree of freedom | p-values |
|------------------------------|-------------------|----------|
| Number of fruits (per plant) | 9                 | < 0.001  |
| Tomato yield (kg per plant)  | 9                 | < 0.001  |
| Yield gain (%)               | 8                 | < 0.001  |

The only source of variation was the weed control treatment. The p-values < 0.05 are significant.
